# Supplementary material for: Boosting oxygen evolution reaction activity by tailoring MOF-derived hierarchical Co–Ni alloy nanoparticles encapsulated in nitrogen-doped carbon frameworks
Source: Royal Society of Chemistry journal article supplement (doi:10.1039/d0ra10713a), 2021-01-01
Supplement: d0ra10713a1.pdf [file d0ra10713a1.pdf]

## **Supporting information**

# **Boosting Oxygen Evolution Reaction Activity by Tailoring MOF-Derived Hierarchical Co-Ni Alloy Nanoparticles Encapsulated in Nitrogen-Doped Carbon Frameworks**

Xiaobin Liu, Xudong Zhao, and Li-Zhen Fan\*

Beijing Advanced Innovation Center for Materials Genome Engineering, Institute of Advanced Materials and Technology, University of Science and Technology Beijing, Beijing 100083, China. E-mail: fanlizhen@ustb.edu.cn (L.-Z. Fan).

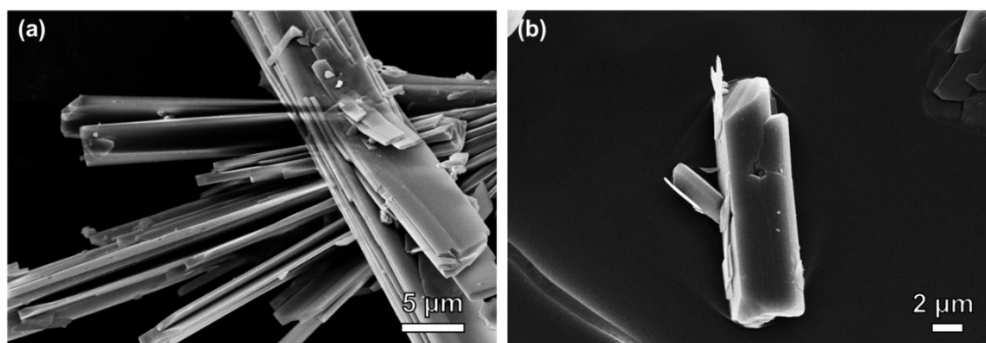

Figure S1. SEM images of the Co<sub>2</sub>Ni-MOF precursor.

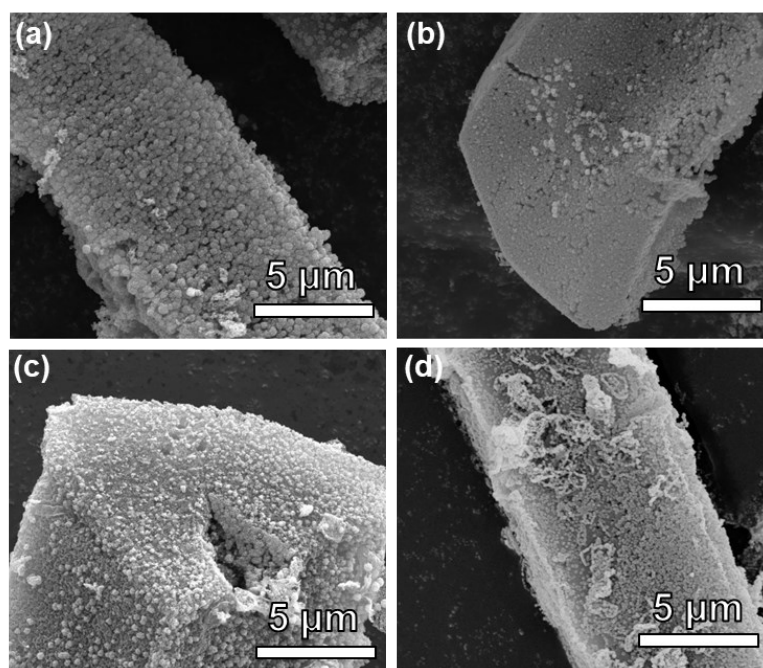

Figure S2. SEM images of (a) Co@NC, (b) CoNi<sub>2</sub>@NC, (c) CoNi@NC and (d) Ni@NC.

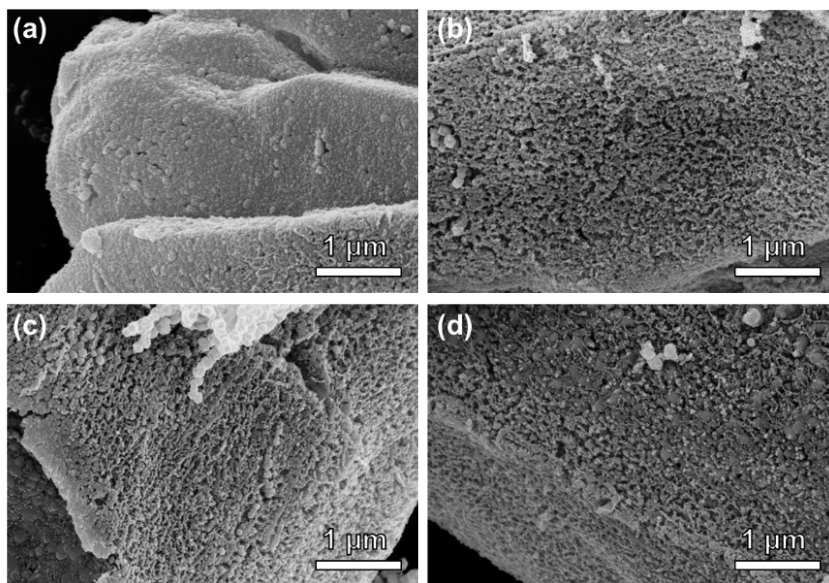

Figure S3. SEM images of (a) Co<sub>2</sub>Ni@NC-600, (b) Co<sub>2</sub>Ni@NC-700, (c) Co<sub>2</sub>Ni@NC-900 and (d) Co<sub>2</sub>Ni@NC-1000.

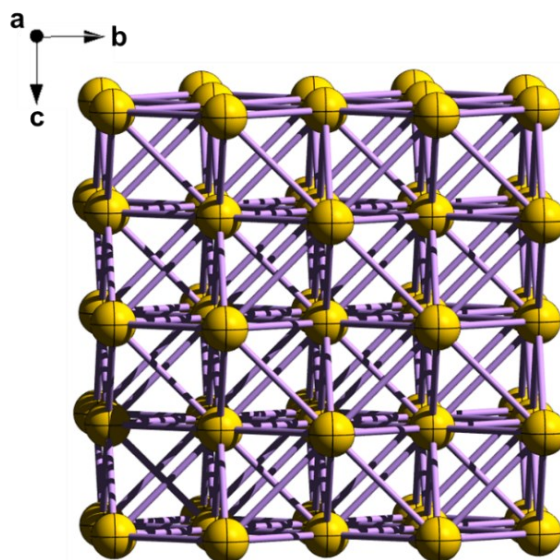

Figure S4. The face-centered cubic stack geometry configuration of cobalt and nickel metal.

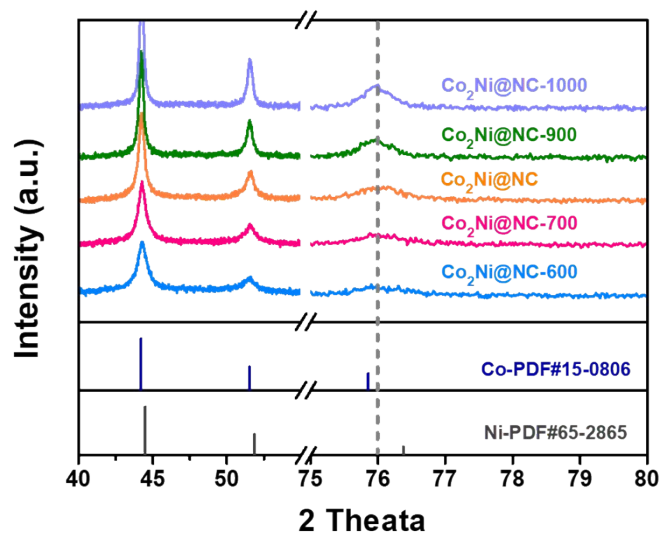

Figure S5. The XRD patterns of  $\text{Co}_2\text{Ni}@NC$ -T at different temperatures.

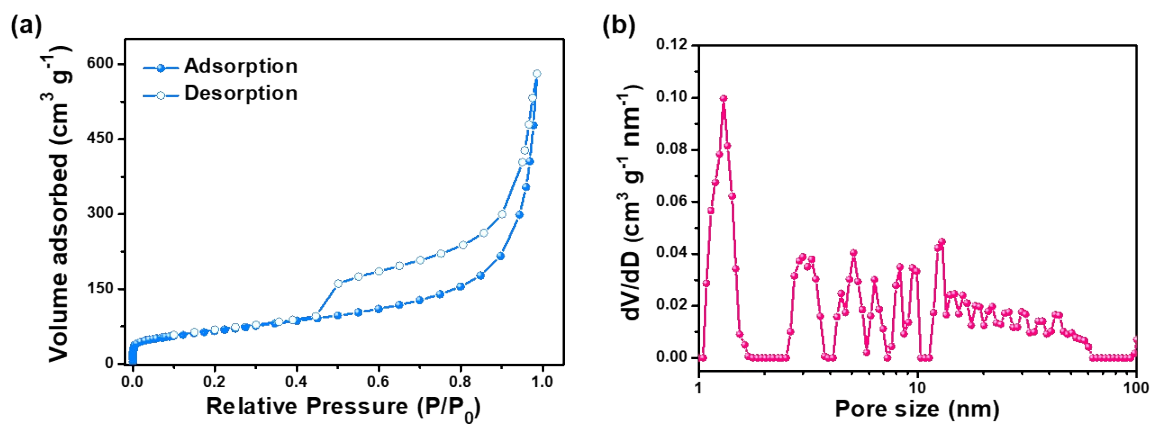

Figure S6. (a)  $\text{N}_2$  adsorption-desorption isotherm and (b) pore size distribution curve of  $\text{Co}_2\text{Ni}@NC$ .

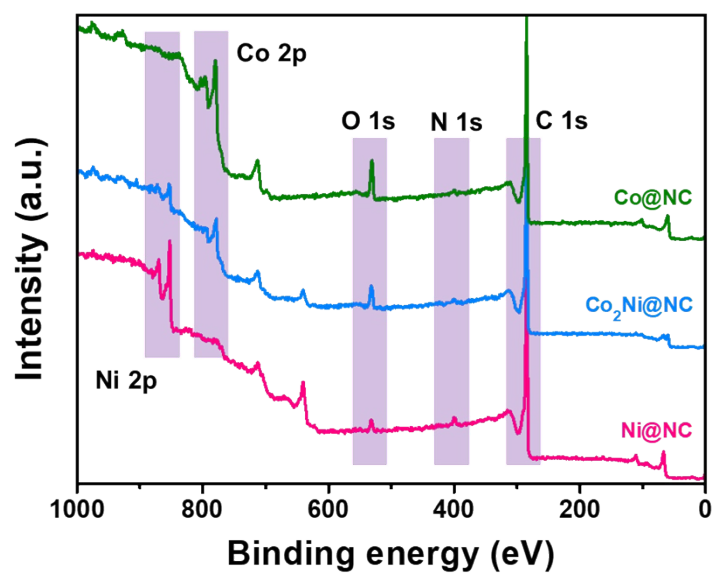

Figure S7. Survey XPS spectra of Co@NC, Co<sub>2</sub>Ni@NC and Ni@NC.

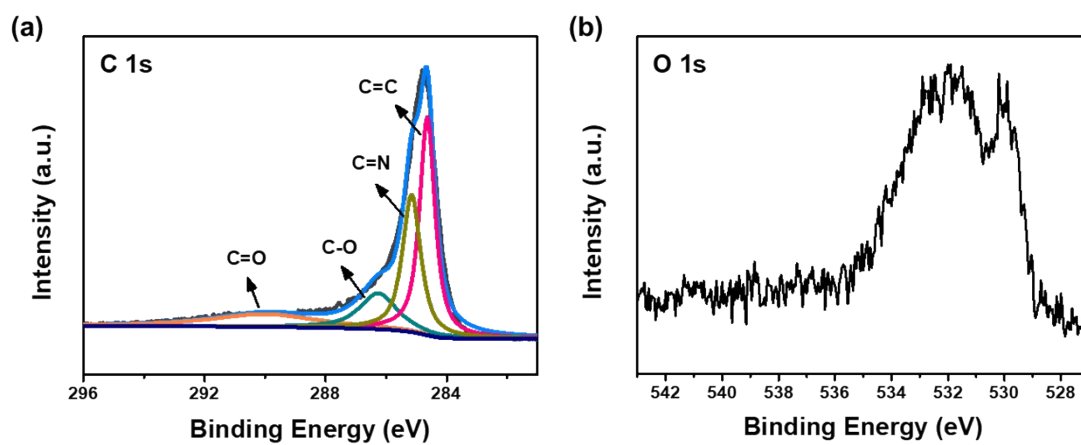

Figure S8. The high-resolution XPS spectrum of a) C 1s and b) O 1s in Co<sub>2</sub>Ni@NC.

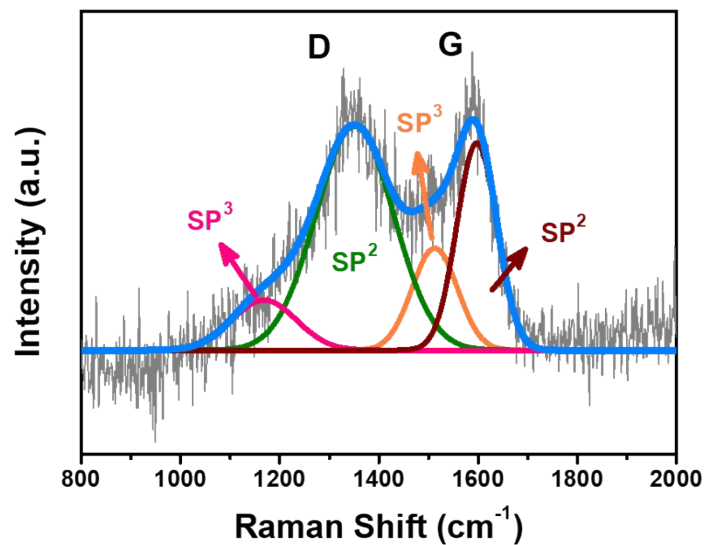

Figure S9. Raman spectrum of Co<sub>2</sub>Ni@NC.

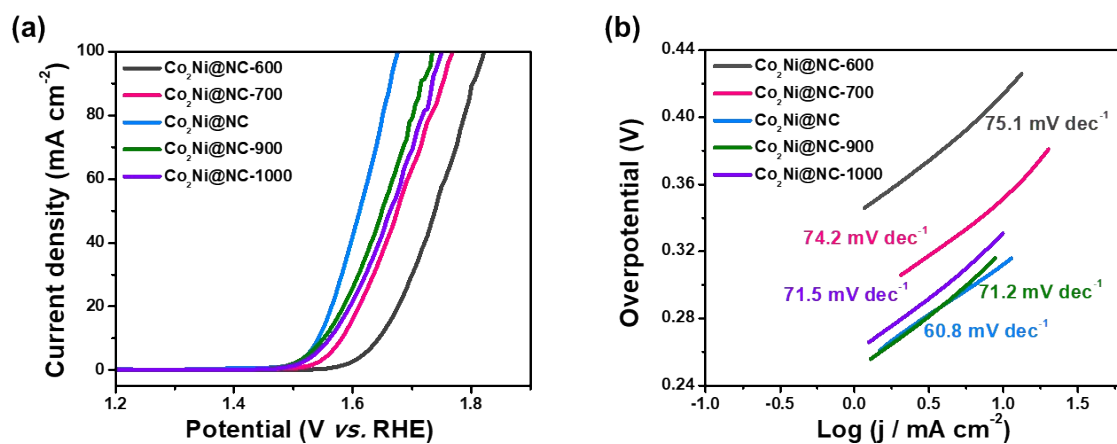

Figure S10. (a) LSV curves and the corresponding (b) Tafel slopes of Co<sub>2</sub>Ni@NC-600, Co<sub>2</sub>Ni@NC-700, Co<sub>2</sub>Ni@NC, Co<sub>2</sub>Ni@NC-900 and Co<sub>2</sub>Ni@NC-1000.

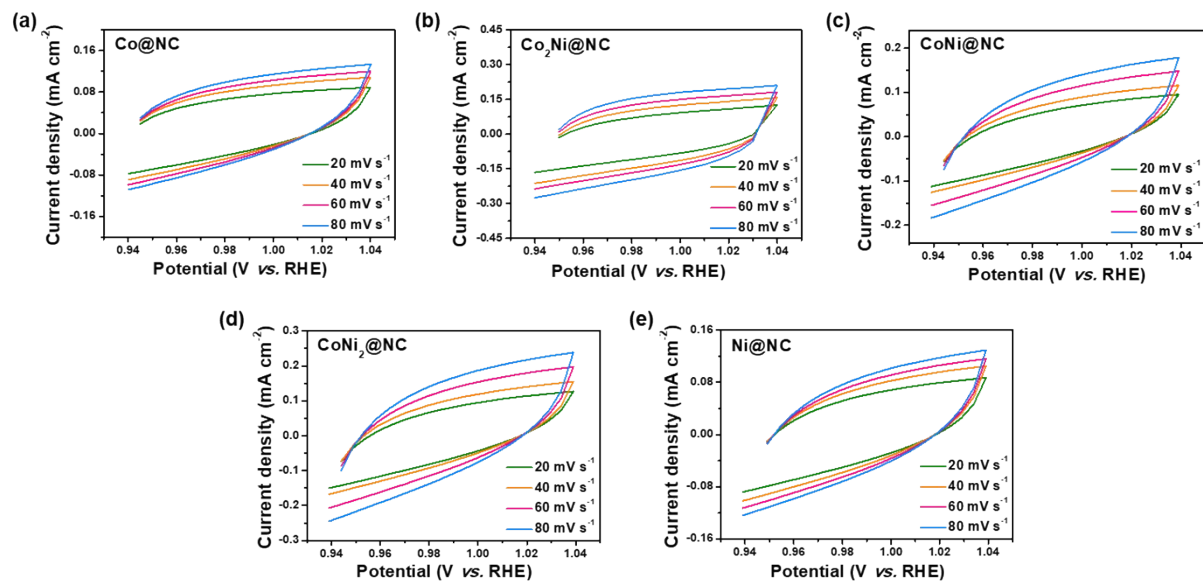

Figure S11. Cyclic voltammograms (0.94 - 1.04 V vs. RHE) of (a) Co@NC, (b) Co<sub>2</sub>Ni@NC, (c) CoNi@NC, (d) CoNi<sub>2</sub>@NC and (e) Ni@NC recorded in 1.0 M KOH.

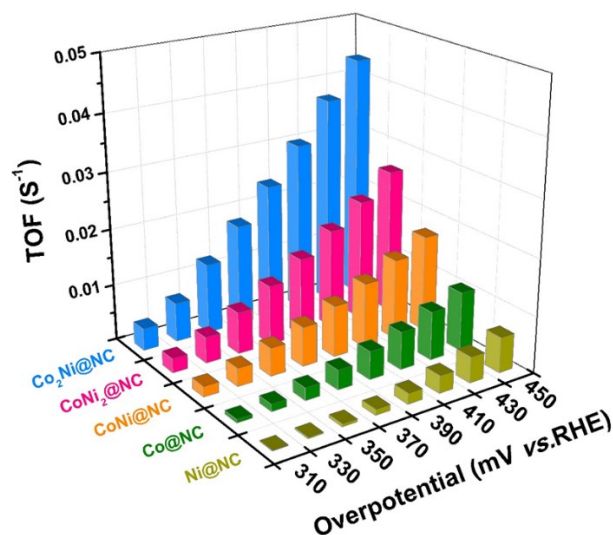

Figure S12. TOFs at different overpotentials from 310 to 450 mV by assuming that every Co or Ni atoms are catalytically active.

The TOF can be calculated with the equation as follow:

$$TOF = \frac{j \times A}{4 \times F \times n}$$

where  $j$  is the current density ( $\text{mA cm}^{-2}$ ) at a measured overpotential in the range of 310 mV to 450 mV,  $A$  is the geometric area of the glassy carbon electrode,  $F$  is the faraday constant with value of  $96485 \text{ C mol}^{-1}$ , and  $n$  is the number of molecular weight of the catalyst that are deposited onto the glassy carbon electrode.



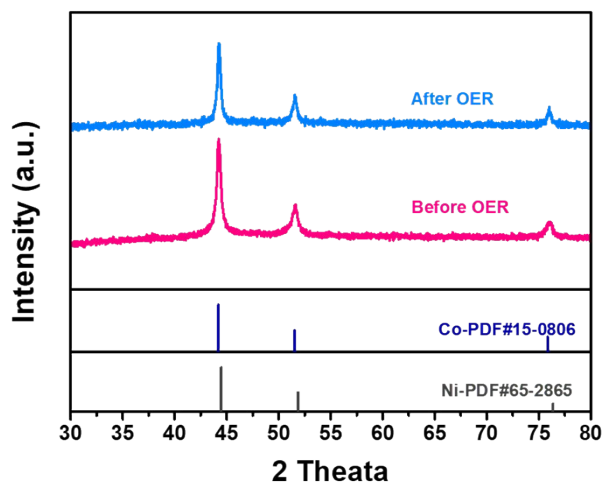

Figure S13. XRD patterns of the  $\text{Co}_2\text{Ni@NC}$  after continuous oxygen reaction evolution in alkaline electrolyte solution.

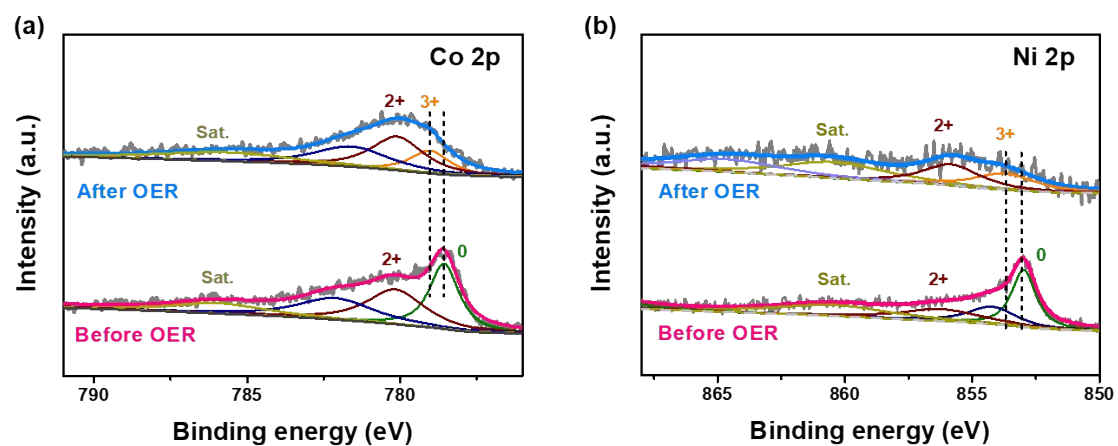

Figure S14. XPS patterns of (a) Co 2p and (b) Ni 2p in  $\text{Co}_2\text{Ni@NC}$  before and after continuous oxygen evolution reaction in alkaline electrolyte solution.

Table S1 Comparison of the OER electrocatalytic activity of Co<sub>2</sub>Ni@NC with previously reported Co-based electrocatalysts.

| Catalyst                             | Electrolyte | $\eta$ (10 mA cm <sup>-2</sup> ) | Tafel slope (mV dec <sup>-1</sup> ) | Ref       |
|--------------------------------------|-------------|----------------------------------|-------------------------------------|-----------|
| Co <sub>2</sub> Ni@NC                | 1 M KOH     | 310                              | 60.8                                | This work |
| CoN <sub>x</sub>                     | 1 M KOH     | 315                              | 75.7                                | 1         |
| CoNiS <sub>x</sub>                   | 1 M KOH     | 320                              | 59                                  | 2         |
| Co/NiCo <sub>2</sub> O <sub>4</sub>  | 0.1 M KOH   | 339                              | 60                                  | 3         |
| NiO/NiCo <sub>2</sub> O <sub>4</sub> | 1 M KOH     | 340                              | 66                                  | 4         |
| CoNi/CoNiO <sub>2</sub>              | 1 M KOH     | 341                              | 84                                  | 5         |
| CoNi                                 | 1 M KOH     | 420                              | 107                                 | 6         |

1. Z. Liang, C. Zhang, H. Yuan, W. Zhang, H. Zheng and R. Cao, *Chem. Commun.*, 2018, **54**, 7519–7522.
2. Z. Yu, Y. Bai, S. Zhang, Y. Liu, N. Zhang and K Sun, *Int. J. Hydrogen Energy*, 2018, **43**, 8815–8823.
3. J. Li, S. Lu, H. Huang, D. Liu, Z. Zhuang and C Zhong, *ACS Sustainable Chem. Eng.*, 2018, **6**, 10021–10029.
4. Y. Wang, Z. Zhang, X. Liu, F. Ding, P. Zou, X. Wang, Q. Zhao and H. Rao, *ACS Sustainable Chem. Eng.*, 2018, **6**, 12511–12521.
5. H. Xu, Z.-X. Shi, Y.-X. Tong and G.-R. Li, *Adv. Mater.*, 2018, **30**, 1705442.
6. A. Jayakumar, R. P. Antony, J. Zhao and J.-M. Lee, *Electrochim. Acta*, 2018, **265**, 336–347.

The cartesian coordinates of all the optimized models:

Co(111)

|                     |                    |                     |
|---------------------|--------------------|---------------------|
| 1.0000000000000000  |                    |                     |
| 4.9243001937999997  | 0.0000000000000000 | 0.0000000000000000  |
| -2.4621500968999999 | 4.2645690636999998 | 0.0000000000000000  |
| 0.0000000000000000  | 0.0000000000000000 | 30.0000000000000000 |

Co

12

Selective dynamics

Direct

|                     |                     |                    |   |   |
|---------------------|---------------------|--------------------|---|---|
| 0.6666700500000005  | 0.3333400030000035  | 0.0003299999999982 | F | F |
| F                   |                     |                    |   |   |
| 0.3333300170000015  | 0.6666700549999973  | 0.0673400000000015 | F | F |
| F                   |                     |                    |   |   |
| -0.0000003705398125 | -0.0000000551219042 | 0.1339718564344826 | T | T |
| T                   |                     |                    |   |   |
| 0.6666700629999980  | 0.8333400289999986  | 0.0003299999999982 | F | F |
| F                   |                     |                    |   |   |
| 0.3333300139999977  | 0.1666700019999965  | 0.0673400000000015 | F | F |
| F                   |                     |                    |   |   |
| -0.0000002799796252 | 0.5000000665530400  | 0.1339718823029691 | T | T |
| T                   |                     |                    |   |   |
| 0.1666700150000011  | 0.8333400289999986  | 0.0003299999999982 | F | F |
| F                   |                     |                    |   |   |
| 0.8333300139999977  | 0.1666700019999965  | 0.0673400000000015 | F | F |
| F                   |                     |                    |   |   |
| 0.4999993513037376  | 0.4999999687119612  | 0.1339718520703188 | T | T |
| T                   |                     |                    |   |   |
| 0.1666700019999965  | 0.3333400030000035  | 0.0003299999999982 | F | F |
| F                   |                     |                    |   |   |
| 0.8333299920000030  | 0.6666700549999973  | 0.0673400000000015 | F | F |
| F                   |                     |                    |   |   |
| 0.4999993270247353  | -0.0000002400019065 | 0.1339718374769871 | T | T |
| T                   |                     |                    |   |   |

Co(111)-H

|                     |                    |                     |
|---------------------|--------------------|---------------------|
| 1.0000000000000000  |                    |                     |
| 4.9243001937999997  | 0.0000000000000000 | 0.0000000000000000  |
| -2.4621500968999999 | 4.2645690636999998 | 0.0000000000000000  |
| 0.0000000000000000  | 0.0000000000000000 | 30.0000000000000000 |

Co H

12 1

Selective dynamics

|        |                     |                     |                    |   |   |
|--------|---------------------|---------------------|--------------------|---|---|
| Direct |                     |                     |                    |   |   |
| F      | 0.6666700500000005  | 0.3333400030000035  | 0.0003299999999982 | F | F |
| F      | 0.3333300170000015  | 0.6666700549999973  | 0.0673400000000015 | F | F |
| T      | -0.0000015332425495 | 0.0000000278769508  | 0.1332994876836260 | T | T |
| F      | 0.6666700629999980  | 0.8333400289999986  | 0.0003299999999982 | F | F |
| F      | 0.3333300139999977  | 0.1666700019999965  | 0.0673400000000015 | F | F |
| T      | 0.0031307158081299  | 0.5015662839926978  | 0.1342328784796004 | T | T |
| F      | 0.1666700150000011  | 0.8333400289999986  | 0.0003299999999982 | F | F |
| F      | 0.8333300139999977  | 0.1666700019999965  | 0.0673400000000015 | F | F |
| T      | 0.4984330481127162  | 0.5015660057982991  | 0.1342331548111508 | T | T |
| F      | 0.1666700019999965  | 0.3333400030000035  | 0.0003299999999982 | F | F |
| F      | 0.8333299920000030  | 0.6666700549999973  | 0.0673400000000015 | F | F |
| T      | 0.4984319539673989  | -0.0031333516779473 | 0.1342330123975682 | T | T |
| T      | 0.6666655290355812  | 0.3333309722600203  | 0.1662660223102070 | T | T |

Co(111)-O

|                     |                    |                     |
|---------------------|--------------------|---------------------|
| 1.0000000000000000  |                    |                     |
| 4.9243001937999997  | 0.0000000000000000 | 0.0000000000000000  |
| -2.4621500968999999 | 4.2645690636999998 | 0.0000000000000000  |
| 0.0000000000000000  | 0.0000000000000000 | 30.0000000000000000 |

Co O

12 1

Selective dynamics

|        |                     |                    |                    |   |   |
|--------|---------------------|--------------------|--------------------|---|---|
| Direct |                     |                    |                    |   |   |
| F      | 0.6666700500000005  | 0.3333400030000035 | 0.0003299999999982 | F | F |
| F      | 0.3333300170000015  | 0.6666700549999973 | 0.0673400000000015 | F | F |
| T      | -0.0000006520794779 | 0.0000007391139833 | 0.1321002201137553 | T | T |
| F      | 0.6666700629999980  | 0.8333400289999986 | 0.0003299999999982 | F | F |

|   |                    |                     |                    |   |   |
|---|--------------------|---------------------|--------------------|---|---|
| F | 0.3333300139999977 | 0.1666700019999965  | 0.0673400000000015 | F | F |
| F | 0.0090886547868631 | 0.5045438851250365  | 0.1360183980868310 | T | T |
| T | 0.1666700150000011 | 0.8333400289999986  | 0.0003299999999982 | F | F |
| F | 0.8333300139999977 | 0.1666700019999965  | 0.0673400000000015 | F | F |
| F | 0.4954557829599352 | 0.5045424145677553  | 0.1360189653861942 | T | T |
| T | 0.1666700019999965 | 0.3333400030000035  | 0.0003299999999982 | F | F |
| F | 0.8333299920000030 | 0.6666700549999973  | 0.0673400000000015 | F | F |
| F | 0.4954549749989264 | -0.0090892811363880 | 0.1360186785598667 | T | T |
| T | 0.6666660216859774 | 0.3333252761432879  | 0.1739719028132380 | T | T |
| T |                    |                     |                    |   |   |

Co(111)-OH

|                     |                    |                     |  |
|---------------------|--------------------|---------------------|--|
| 1.0000000000000000  |                    |                     |  |
| 4.9243001937999997  | 0.0000000000000000 | 0.0000000000000000  |  |
| -2.4621500968999999 | 4.2645690636999998 | 0.0000000000000000  |  |
| 0.0000000000000000  | 0.0000000000000000 | 30.0000000000000000 |  |
| Co                  | O                  | H                   |  |
| 12                  | 1                  | 1                   |  |

Selective dynamics

Direct

|                    |                     |                    |                    |   |   |
|--------------------|---------------------|--------------------|--------------------|---|---|
| 0.6666700500000005 | 0.3333400030000035  | 0.0003299999999982 | F                  | F |   |
| F                  | 0.3333300170000015  | 0.6666700549999973 | 0.0673400000000015 | F | F |
| F                  | -0.0000022728212852 | 0.0000292359310283 | 0.1314711166331614 | T | T |
| T                  | 0.6666700629999980  | 0.8333400289999986 | 0.0003299999999982 | F | F |
| F                  | 0.3333300139999977  | 0.1666700019999965 | 0.0673400000000015 | F | F |
| F                  | 0.0084580341682610  | 0.5042498200024262 | 0.1358654383090594 | T | T |
| T                  | 0.1666700150000011  | 0.8333400289999986 | 0.0003299999999982 | F | F |
| F                  | 0.8333300139999977  | 0.1666700019999965 | 0.0673400000000015 | F | F |

|   |                    |                    |                    |   |   |
|---|--------------------|--------------------|--------------------|---|---|
| F | 0.4957715591112698 | 0.5042551541251945 | 0.1358400279417204 | T | T |
| T | 0.1666700019999965 | 0.3333400030000035 | 0.0003299999999982 | F | F |
| F | 0.8333299920000030 | 0.6666700549999973 | 0.0673400000000015 | F | F |
| F | 0.4958073489703548 | 0.9916222174513399 | 0.1358684949624763 | T | T |
| T | 0.6665320962536947 | 0.3334646687971722 | 0.1816690259415031 | T | T |
| T | 0.6660076293664297 | 0.3340597173751905 | 0.2140375537471107 | T | T |
| T |                    |                    |                    |   |   |

Co(111)-OOH

|                     |                    |                     |  |
|---------------------|--------------------|---------------------|--|
| 1.0000000000000000  |                    |                     |  |
| 4.9243001937999997  | 0.0000000000000000 | 0.0000000000000000  |  |
| -2.4621500968999999 | 4.2645690636999998 | 0.0000000000000000  |  |
| 0.0000000000000000  | 0.0000000000000000 | 30.0000000000000000 |  |

Co O H  
12 2 1

Selective dynamics

Direct

|                     |                     |                    |   |   |
|---------------------|---------------------|--------------------|---|---|
| 0.6666700500000005  | 0.3333400030000035  | 0.0003299999999982 | F | F |
| F                   |                     |                    |   |   |
| 0.3333300170000015  | 0.6666700549999973  | 0.0673400000000015 | F | F |
| F                   |                     |                    |   |   |
| -0.0001335700760283 | -0.0000644515613440 | 0.1300644827858781 | T | T |
| T                   |                     |                    |   |   |
| 0.6666700629999980  | 0.8333400289999986  | 0.0003299999999982 | F | F |
| F                   |                     |                    |   |   |
| 0.3333300139999977  | 0.1666700019999965  | 0.0673400000000015 | F | F |
| F                   |                     |                    |   |   |
| 0.9941494684583362  | 0.4970560138343664  | 0.1372077114407721 | T | T |
| T                   |                     |                    |   |   |
| 0.1666700150000011  | 0.8333400289999986  | 0.0003299999999982 | F | F |
| F                   |                     |                    |   |   |
| 0.8333300139999977  | 0.1666700019999965  | 0.0673400000000015 | F | F |
| F                   |                     |                    |   |   |
| 0.5025412817313730  | 0.4971229306485292  | 0.1372651281086442 | T | T |
| T                   |                     |                    |   |   |
| 0.1666700019999965  | 0.3333400030000035  | 0.0003299999999982 | F | F |
| F                   |                     |                    |   |   |
| 0.8333299920000030  | 0.6666700549999973  | 0.0673400000000015 | F | F |

|   |                    |                    |                    |   |   |
|---|--------------------|--------------------|--------------------|---|---|
| F | 0.5025231248873665 | 0.0054302829158161 | 0.1372695237317980 | T | T |
| T | 0.6665565014299120 | 0.3332850089292599 | 0.1788978070476726 | T | T |
| T | 0.3327917291997627 | 0.6663911185646116 | 0.1823857551312400 | T | T |
| T | 0.3298566249273242 | 0.6649420782401375 | 0.2147926215767540 | T | T |
| T |                    |                    |                    |   |   |

CoNi(111)

|                     |                    |                     |
|---------------------|--------------------|---------------------|
| 1.0000000000000000  |                    |                     |
| 4.9243001937999997  | 0.0000000000000000 | 0.0000000000000000  |
| -2.4621500968999999 | 4.2645690636999998 | 0.0000000000000000  |
| 0.0000000000000000  | 0.0000000000000000 | 30.0000000000000000 |

Co Ni  
8 4

Selective dynamics

Direct

|                    |                     |                     |                    |   |   |
|--------------------|---------------------|---------------------|--------------------|---|---|
| 0.6666700500000005 | 0.3333400030000035  | 0.0003299999999982  | F                  | F |   |
| F                  | 0.3333300170000015  | 0.6666700549999973  | 0.0673400000000015 | F | F |
| F                  | 0.6666700629999980  | 0.8333400289999986  | 0.0003299999999982 | F | F |
| F                  | 0.3333300139999977  | 0.1666700019999965  | 0.0673400000000015 | F | F |
| F                  | 0.1666700150000011  | 0.8333400289999986  | 0.0003299999999982 | F | F |
| F                  | 0.8333300139999977  | 0.1666700019999965  | 0.0673400000000015 | F | F |
| F                  | 0.1666700019999965  | 0.3333400030000035  | 0.0003299999999982 | F | F |
| F                  | 0.8333299920000030  | 0.6666700549999973  | 0.0673400000000015 | F | F |
| F                  | -0.0000003619079989 | -0.0000001295137264 | 0.1346120978369993 | T | T |
| T                  | -0.0000003277681724 | 0.4999999462865708  | 0.1346124070159955 | T | T |
| T                  | 0.4999996900935102  | 0.4999999100860196  | 0.1346123084198105 | T | T |
| T                  | 0.4999996140629885  | -0.0000001655750949 | 0.1346121826413619 | T | T |
| T                  |                     |                     |                    |   |   |

CoNi(111)-H

```

1.0000000000000000
  4.9243001937999997  0.0000000000000000  0.0000000000000000
 -2.4621500968999999  4.2645690636999998  0.0000000000000000
  0.0000000000000000  0.0000000000000000  30.0000000000000000

```

```

Co  Ni  H
  8   4   1

```

Selective dynamics

Direct

```

0.6666700500000005  0.3333400030000035  0.0003299999999982  F  F
F
0.3333300170000015  0.6666700549999973  0.0673400000000015  F  F
F
0.6666700629999980  0.8333400289999986  0.0003299999999982  F  F
F
0.3333300139999977  0.1666700019999965  0.0673400000000015  F  F
F
0.1666700150000011  0.8333400289999986  0.0003299999999982  F  F
F
0.8333300139999977  0.1666700019999965  0.0673400000000015  F  F
F
0.1666700019999965  0.3333400030000035  0.0003299999999982  F  F
F
0.8333299920000030  0.6666700549999973  0.0673400000000015  F  F
F
0.0000042604731429  0.0000079492156659  0.1342956235730528  T  T
T
0.0021894711169815  0.5010975990900062  0.1352947303262866  T  T
T
0.4988981493468221  0.5010974966890732  0.1352949756650909  T  T
T
0.4989014642128784  0.9978129117195177  0.1352946643362380  T  T
T
0.6666680101583616  0.3333393397440707  0.1659867416863905  T  T
T

```

CoNi(111)-O

```

1.0000000000000000
  4.9243001937999997  0.0000000000000000  0.0000000000000000
 -2.4621500968999999  4.2645690636999998  0.0000000000000000
  0.0000000000000000  0.0000000000000000  30.0000000000000000

```

```

Co  Ni  O
  8   4   1

```

Selective dynamics



|        |                     |                    |                    |   |   |
|--------|---------------------|--------------------|--------------------|---|---|
| Direct |                     |                    |                    |   |   |
|        | 0.6666700500000005  | 0.3333400030000035 | 0.0003299999999982 | F | F |
| F      |                     |                    |                    |   |   |
|        | 0.3333300170000015  | 0.6666700549999973 | 0.0673400000000015 | F | F |
| F      |                     |                    |                    |   |   |
|        | 0.6666700629999980  | 0.8333400289999986 | 0.0003299999999982 | F | F |
| F      |                     |                    |                    |   |   |
|        | 0.3333300139999977  | 0.1666700019999965 | 0.0673400000000015 | F | F |
| F      |                     |                    |                    |   |   |
|        | 0.1666700150000011  | 0.8333400289999986 | 0.0003299999999982 | F | F |
| F      |                     |                    |                    |   |   |
|        | 0.8333300139999977  | 0.1666700019999965 | 0.0673400000000015 | F | F |
| F      |                     |                    |                    |   |   |
|        | 0.1666700019999965  | 0.3333400030000035 | 0.0003299999999982 | F | F |
| F      |                     |                    |                    |   |   |
|        | 0.8333299920000030  | 0.6666700549999973 | 0.0673400000000015 | F | F |
| F      |                     |                    |                    |   |   |
|        | -0.0000041484311401 | 0.0000116548819044 | 0.1335610098792603 | T | T |
| T      |                     |                    |                    |   |   |
|        | 0.0065961994640234  | 0.5032830168079764 | 0.1367954300015742 | T | T |
| T      |                     |                    |                    |   |   |
|        | 0.4966743219791426  | 0.5033133026756056 | 0.1367907124495134 | T | T |
| T      |                     |                    |                    |   |   |
|        | 0.4967100670141130  | 0.9934022503004124 | 0.1367952884495853 | T | T |
| T      |                     |                    |                    |   |   |
|        | 0.6666331694260142  | 0.3333321217287745 | 0.1746641003858512 | T | T |
| T      |                     |                    |                    |   |   |

CoNi(111)-OH

|                     |                    |                     |   |
|---------------------|--------------------|---------------------|---|
| 1.0000000000000000  |                    |                     |   |
| 4.9243001937999997  | 0.0000000000000000 | 0.0000000000000000  |   |
| -2.4621500968999999 | 4.2645690636999998 | 0.0000000000000000  |   |
| 0.0000000000000000  | 0.0000000000000000 | 30.0000000000000000 |   |
| Co                  | Ni                 | O                   | H |
| 8                   | 4                  | 1                   | 1 |

Selective dynamics

|        |                    |                    |                    |   |   |
|--------|--------------------|--------------------|--------------------|---|---|
| Direct |                    |                    |                    |   |   |
|        | 0.6666700500000005 | 0.3333400030000035 | 0.0003299999999982 | F | F |
| F      |                    |                    |                    |   |   |
|        | 0.3333300170000015 | 0.6666700549999973 | 0.0673400000000015 | F | F |
| F      |                    |                    |                    |   |   |
|        | 0.6666700629999980 | 0.8333400289999986 | 0.0003299999999982 | F | F |
| F      |                    |                    |                    |   |   |
|        | 0.3333300139999977 | 0.1666700019999965 | 0.0673400000000015 | F | F |

|   |                     |                    |                    |   |   |
|---|---------------------|--------------------|--------------------|---|---|
| F | 0.1666700150000011  | 0.8333400289999986 | 0.0003299999999982 | F | F |
| F | 0.8333300139999977  | 0.1666700019999965 | 0.0673400000000015 | F | F |
| F | 0.1666700019999965  | 0.3333400030000035 | 0.0003299999999982 | F | F |
| F | 0.8333299920000030  | 0.6666700549999973 | 0.0673400000000015 | F | F |
| F | -0.0000149447497625 | 0.0000189513164288 | 0.1326459077160841 | T | T |
| T | 0.0038803124275855  | 0.5019885960603185 | 0.1351733693106736 | T | T |
| T | 0.4979455403316110  | 0.5020520191692018 | 0.1351534727648177 | T | T |
| T | 0.4979972632184711  | 0.9960918336660054 | 0.1351709172456407 | T | T |
| T | 0.6663486178026561  | 0.3335323248889003 | 0.1813008438600054 | T | T |
| T | 0.6661376744019152  | 0.3338664619431930 | 0.2136872307107690 | T | T |
| T |                     |                    |                    |   |   |

CoNi(111)-OOH

|                     |                    |                     |   |
|---------------------|--------------------|---------------------|---|
| 1.0000000000000000  |                    |                     |   |
| 4.9243001937999997  | 0.0000000000000000 | 0.0000000000000000  |   |
| -2.4621500968999999 | 4.2645690636999998 | 0.0000000000000000  |   |
| 0.0000000000000000  | 0.0000000000000000 | 30.0000000000000000 |   |
| Co                  | Ni                 | O                   | H |
| 8                   | 4                  | 2                   | 1 |

Selective dynamics

Direct

|                    |                    |                    |                    |   |   |
|--------------------|--------------------|--------------------|--------------------|---|---|
| 0.6666700500000005 | 0.3333400030000035 | 0.0003299999999982 | F                  | F |   |
| F                  | 0.3333300170000015 | 0.6666700549999973 | 0.0673400000000015 | F | F |
| F                  | 0.6666700629999980 | 0.8333400289999986 | 0.0003299999999982 | F | F |
| F                  | 0.3333300139999977 | 0.1666700019999965 | 0.0673400000000015 | F | F |
| F                  | 0.1666700150000011 | 0.8333400289999986 | 0.0003299999999982 | F | F |
| F                  | 0.8333300139999977 | 0.1666700019999965 | 0.0673400000000015 | F | F |
| F                  | 0.1666700019999965 | 0.3333400030000035 | 0.0003299999999982 | F | F |

|   |                     |                     |                    |   |   |
|---|---------------------|---------------------|--------------------|---|---|
| F | 0.8333299920000030  | 0.6666700549999973  | 0.0673400000000015 | F | F |
| F | -0.0038485068637157 | -0.0018548568275637 | 0.1323860797531532 | T | T |
| T | -0.0040945437069109 | 0.4980143385730522  | 0.1325064717011286 | T | T |
| T | 0.4879663383084742  | 0.4993657069179948  | 0.1407092321129029 | T | T |
| T | 0.4879223986267510  | 0.9886938678168486  | 0.1407102644125726 | T | T |
| T | 0.6973389049990412  | 0.3486882515447656  | 0.1755726661909900 | T | T |
| T | 0.4250240898497025  | 0.7124635520959617  | 0.1919244393853458 | T | T |
| T | 0.2144401734126165  | 0.6071831534223043  | 0.2050446244684276 | T | T |
| T |                     |                     |                    |   |   |
